# Supplementary material for: Breaking down the confinement effect on perovskite growth to fabricate efficient, carbon electrode-based mesoscopic perovskite solar cells via low-temperature and all-air procedures
Source: Royal Society of Chemistry journal article supplement (doi:10.1039/d4tc04780j), 2025-01-01
Supplement: d4tc04780j1.pdf [file d4tc04780j1.pdf]

**Supplementary Information for:**

**Breaking down the confinement effect on perovskite growth to  
fabricate efficient, carbon electrode-based mesoscopic perovskite  
solar cells *via* low-temperature and all-air procedures**

De'en Guo, Jiao Ma, Heng Peng, Xiaohan Yu, Junhao Xue, Haipeng Xie, Han Huang,  
Deming Kong, Conghua Zhou\*

Hunan Key Laboratory of Super-microstructure and Ultrafast Process, Hunan Key  
Laboratory of Nanophotonics and Devices, Institute of Super-microstructure and  
Ultrafast Process in Advanced Materials (ISUPAM), School of Physics, Central South  
University, Changsha, Hunan 410083, China

\* Corresponding author: [chzhou@csu.edu.cn](mailto:chzhou@csu.edu.cn) (C. Zhou)

## **Experimental Section:**

### ***1.1 Materials and Regents***

FTO substrates (Advanced Election Technology), Graphite (99.85%, Sinopharm), Carbon black (Ketjen 600J), Zirconium oxide ( $ZrO_2$ , 99%, Sinopharm), ethanol (99%, Sinopharm), ethylene glycol (EG, 99%, Sinopharm),  $\gamma$ -Butyrolactone (GBL, 99.9%, Aladdin),  $TiO_2$  nanocrystallites (P25, Degussa), lead iodide ( $PbI_2$ , 99.99%, Advanced Election Technology), methylammonium iodide ( $CH_3NH_3I$ ) and  $HOOC(CH_2)_4NH_3I$  (5-AVAI) (Xi'an Polymer Light Technology Corp) were all used as received. Deionized water was prepared in laboratory.

### ***1.2 Materials Synthesis***

Carbon paste was prepared by ball-milling graphite (2 g) and CB ( $x$  g,  $x=0.0625, 0.125, 0.25, 0.5, 0.75, 1.5$  g) in 20 mL alcohol for 24 h.  $ZrO_2$  sol was added as the binder. The speed of the planetary ball mill used is 300 r/min. For thick carbon-electrode, carbon paste is prepared by ball-milling 6g graphite and 1.5g CB in 30 mL ethanol. Perovskite precursor was prepared by dissolving 382 mg  $PbI_2$ , 10 mg 5-AVAI and 132.5 mg MAI in 0.9 mL GBL<sup>1</sup>.

### ***1.3 Device fabrication, and related material and device characterizations***

Device fabrication process of the low-temperature, hole-conductor-free, mesoscopic perovskite solar cells (meso CPSCs) were produced by all air and low-temperature (150°C) processes, following the method described in previous works<sup>1</sup>. For buried interface sample preparation, surface layer of carbon electrode was peeled off by tape, then a drop of polymethyl methacrylate (PMMA) chlorobenzene solution

is casted on the surface, being dried at 60°C, and then peeled off again, from the bottom substrate. Material characterization and device characterization methods were similar to that described elsewhere <sup>2,3</sup>. As for external quantum efficiency (EQE) test, light-soaking was pre-performed, like that done in recording the current density – voltage characteristics.

**Supplementary figures:**

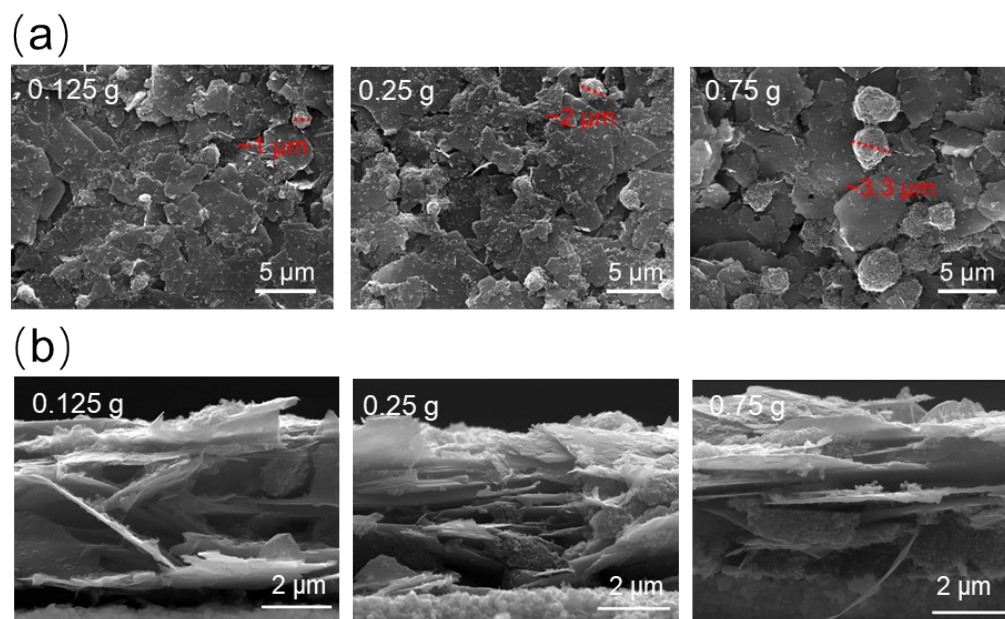

**Fig. S1.** (a, b) SEM images of surface and cross-section of carbon-electrodes with different CB masses.

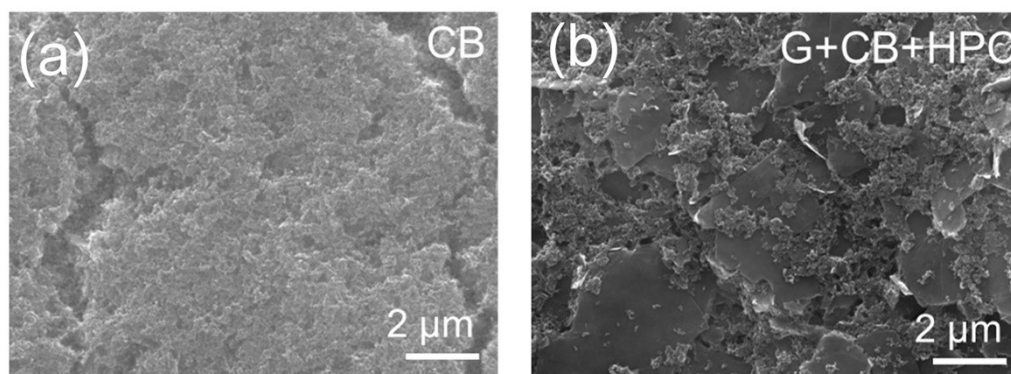

**Fig. S2.** Surface SEM images of carbon-electrode (CE) prepared by. (a) Carbon black (CB); (b) Graphite (G), carbon black (CB) and hydroxypropyl cellulose (HPC).

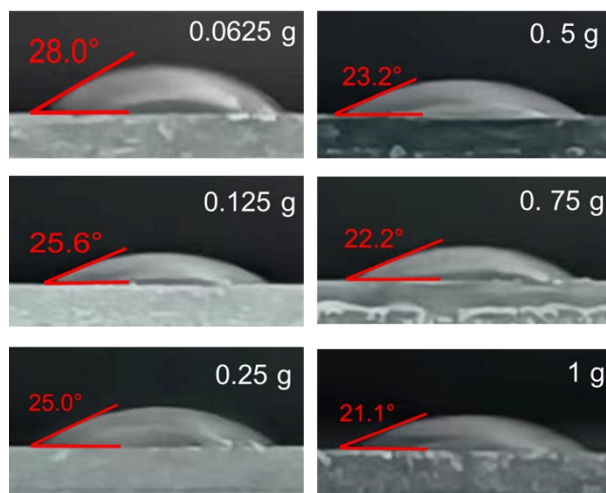

**Fig. S3.** Contact angle test on carbon-electrode prepared by different CB mass.

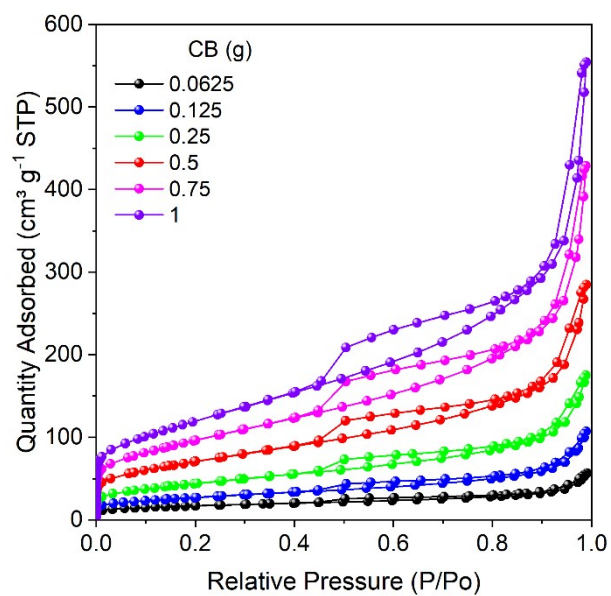

**Fig. S4.** N<sub>2</sub> adsorption-desorption isotherms of carbon-electrodes (CEs).

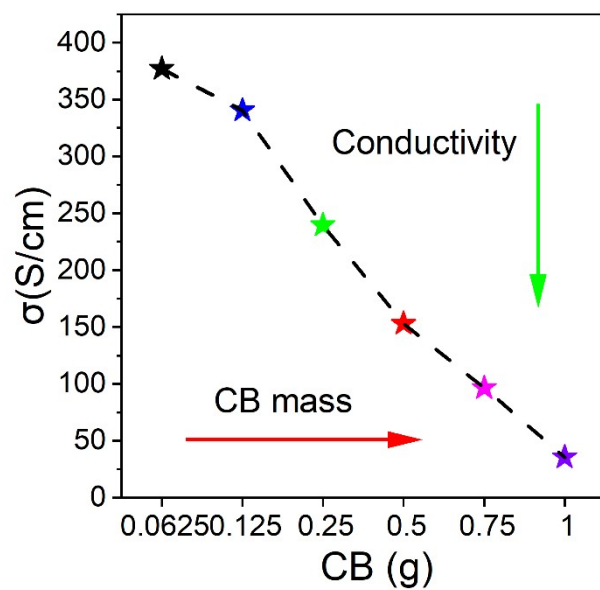

**Fig. S5.** Conductance test on CEs prepared with different CB mass.

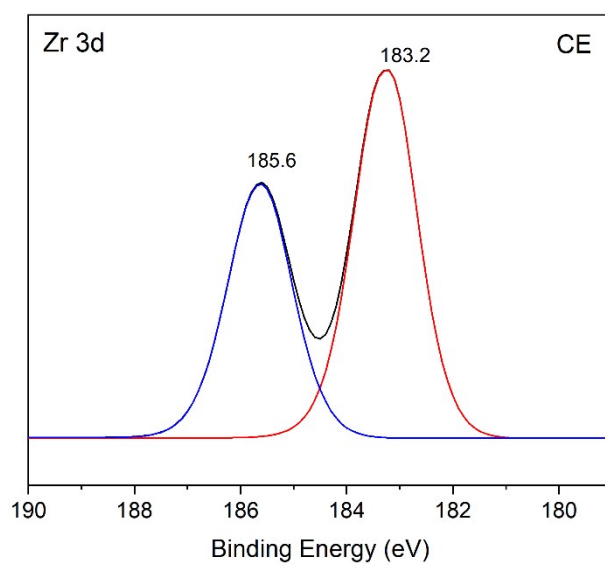

**Fig. S6.** XPS spectra of CE: Zr 3d.

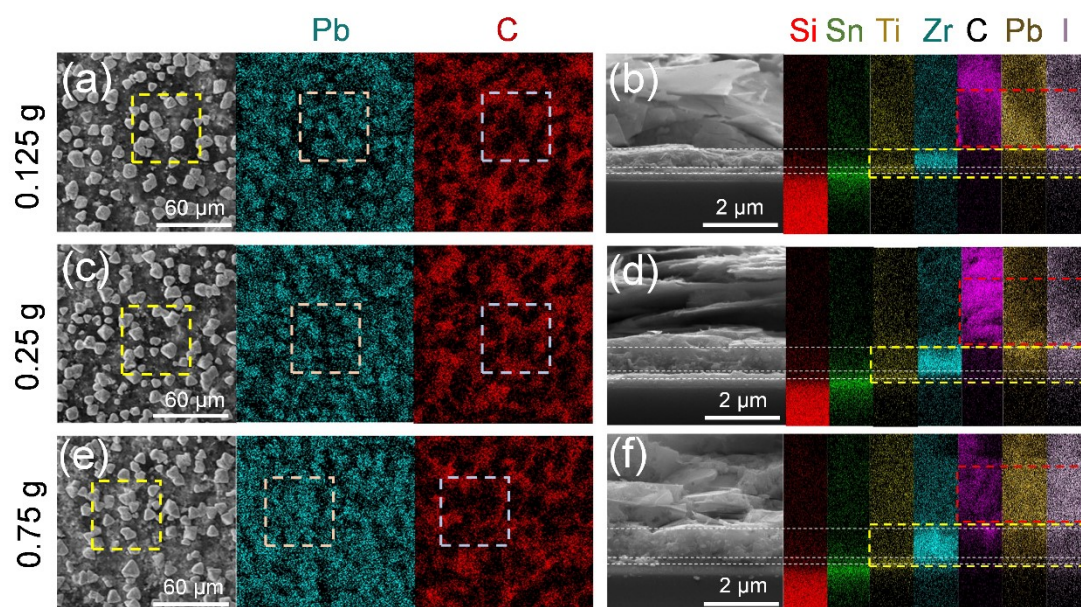

**Fig. S7.** SEM images of surface (left) and cross-section (right) of low-temperature mesoscopic perovskite solar cells (meso CPSCs) with carbon-electrodes prepared with different CB mass.

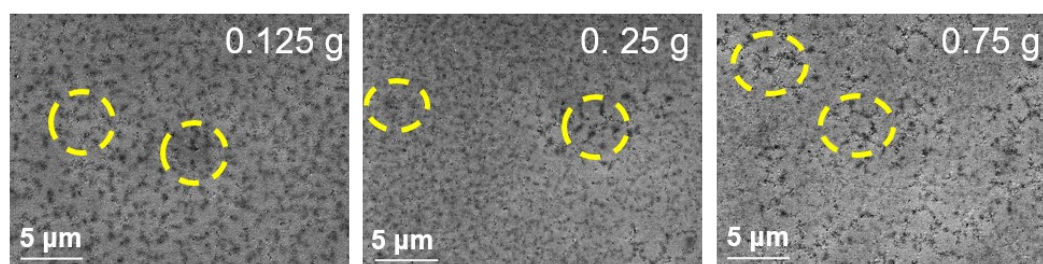

**Fig. S8.** SEM images of “PVSK/ETL” interface.



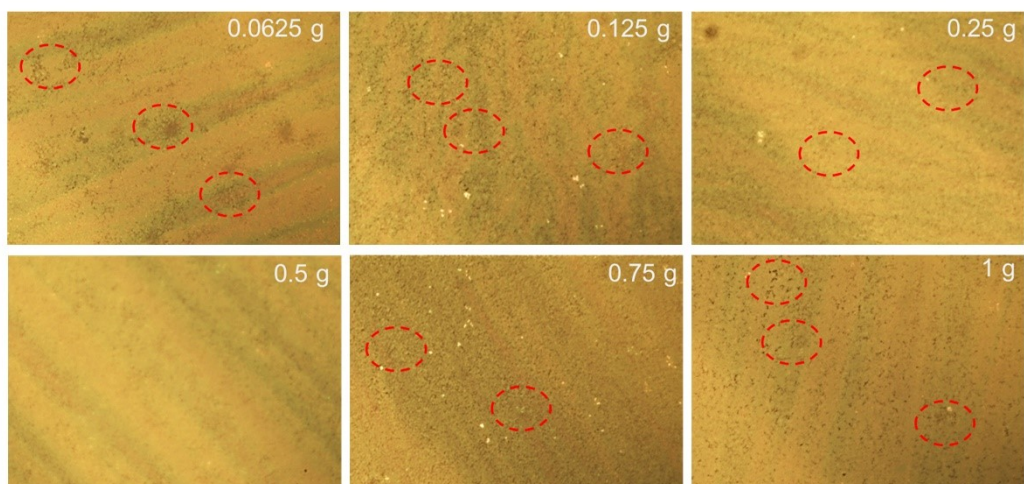

**Fig. S9.** Metallograph images of “PVSK / ETL” interface.

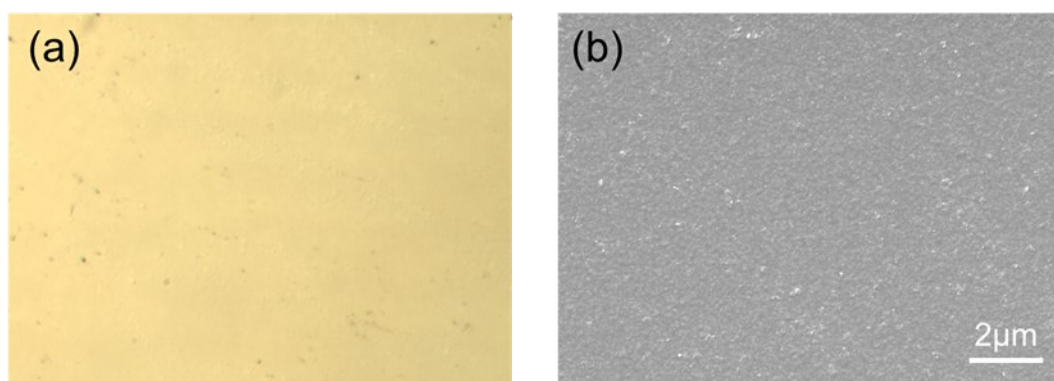

**Fig. S10.** (a) Top-view metallograph images and (b) SEM images of the FTO substrate after the PVSK incorporated layer has been peeled-off, so as to judge the quality of the buried interface.



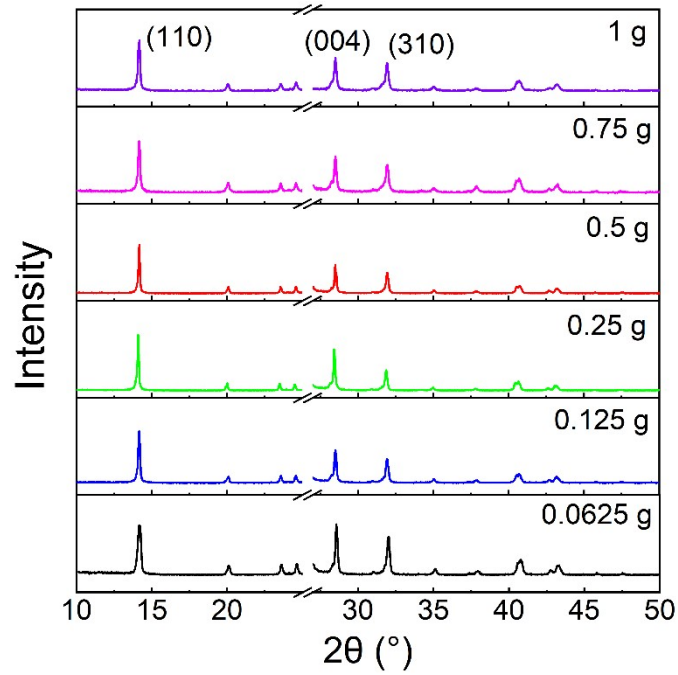

**Fig. S11.** XRD patterns of meso-CPSCs after CE has been partially peeled off. (X-ray is induced from the carbon-electrode).

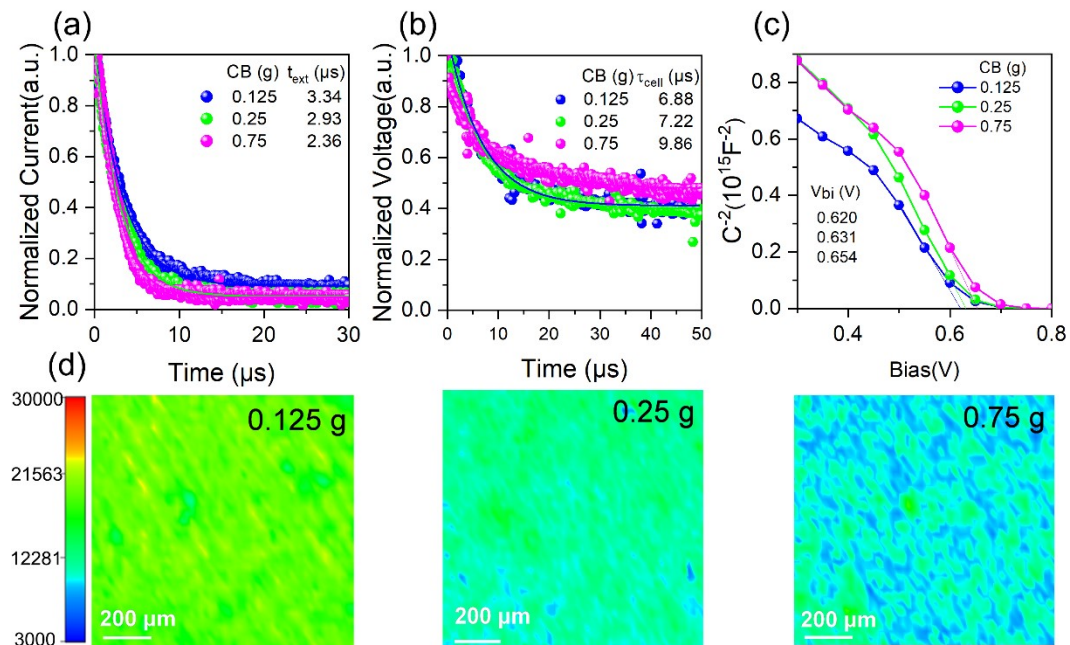

**Fig. S12.** (a, b) TPC / TPV decay curves; (c) Mott–Schottky analysis; and (d) PL mapping of meso-CPSCs (incident laser is guided from the FTO side).

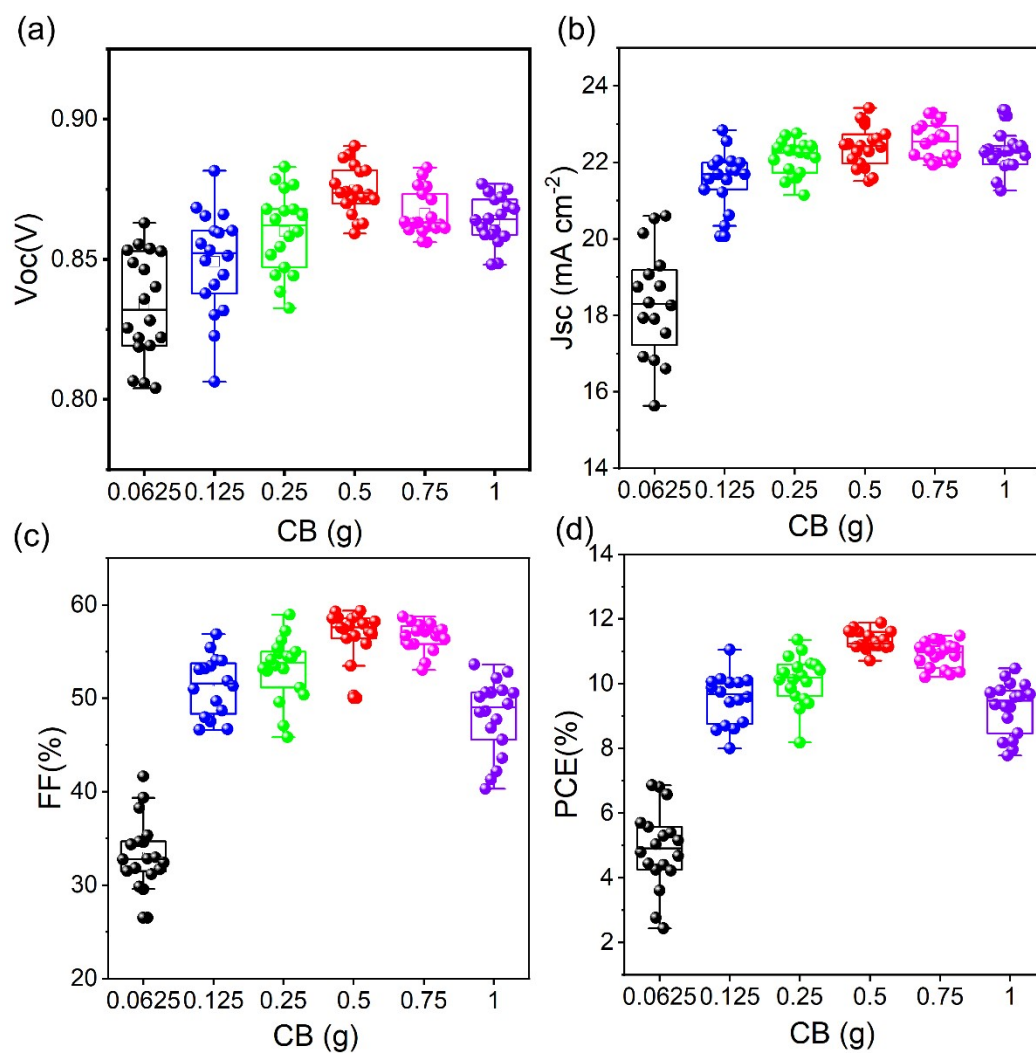

**Fig. S13.** Statistics on performance parameters (reverse scans): (a)  $V_{oc}$ ; (b)  $J_{sc}$ ; (c)  $FF$ ; and (d)  $PCE$ .

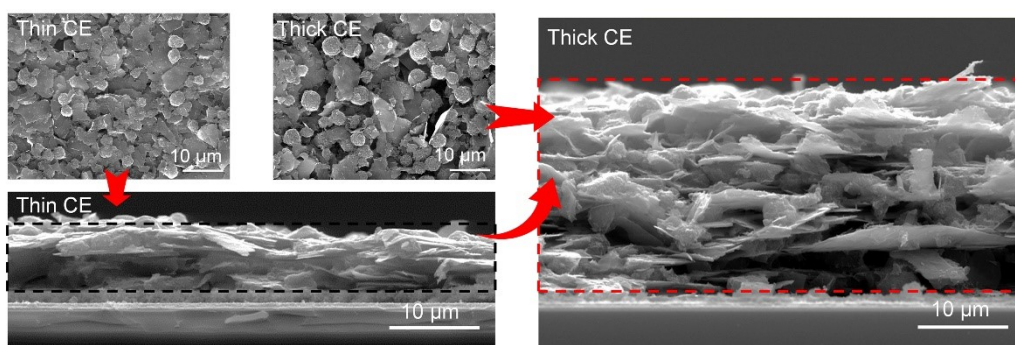

**Fig. S14.** Surface and cross-sectional SEM images of CEs.

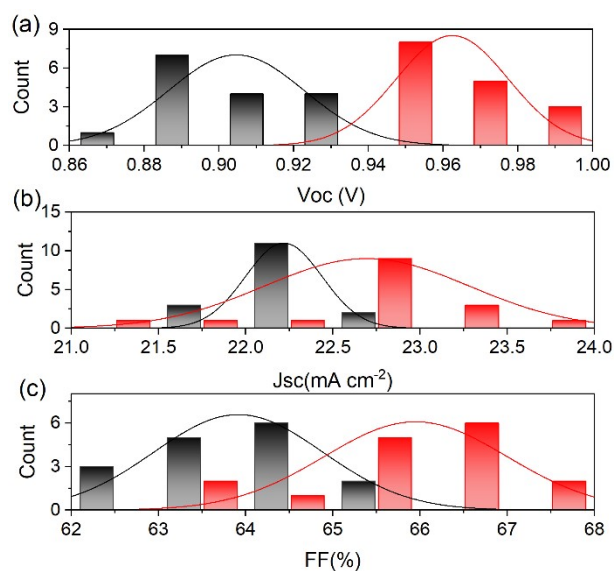

**Fig. S15.** Statistics on performance parameters with thin / thick CEs:  $V_{oc}$ ,  $J_{sc}$ ,  $FF$ .

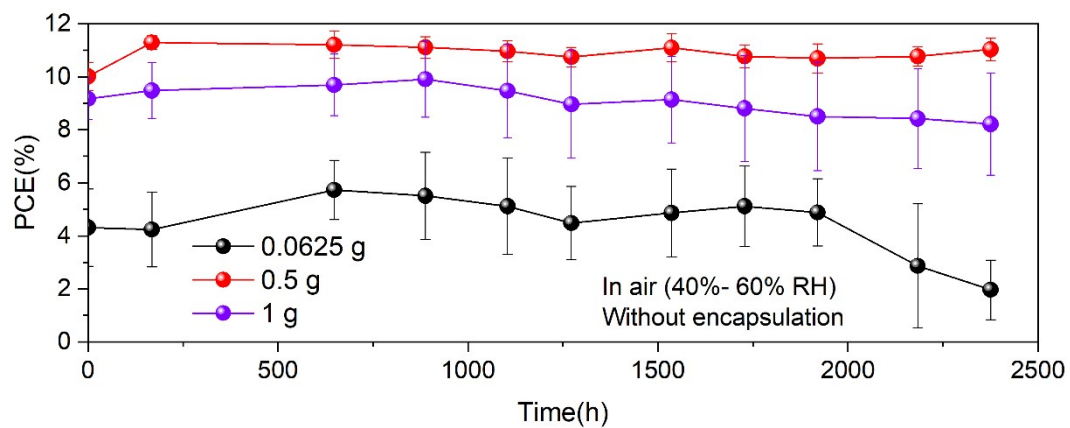

**Fig. S16.** Storage stability test of meso-CPSCs. (Relative humidity 40%~60%, no encapsulation is used).

## References

1. D. Guo, X. Yu, Z. Fang, H. Peng, H. Xie, H. Huang, D. Kong and C. Zhou, *Sol. RRL*, 2024, **8**, 2400021.
2. D. Guo, J. Ma, S. Y. Lin, X. Guo, H. Huang, D. M. Kong, F. X. Xu, Y. L. Gao, W. H. Zhang, Y. Hu and C. H. Zhou, *Appl Phys Lett*, 2022, **120**, 263502.
3. J. Ma, S. Lin, M. Fang, Z. Fang, X. Yu, D. e. Guo, H. Xie, D. Kong, Y. Li and C. Zhou, *Small*, 2024, **20**, 2310196.
